# Supplementary material
Source: ML conference proceedings conference paper supplement (https://openaccess.thecvf.com/content/CVPR2022/html/Liang_RSCFed_Random_Sampling_CVPR_2022_paper.html)
Supplement: Supplementary file 1 [file Liang_RSCFed_Random_Sampling_CVPR_2022_supplemental.pdf]

# RSCFed: Random Sampling Consensus Federated Semi-supervised Learning – Supplemental Materials

Xiaoxiao Liang<sup>1</sup>, Yiqun Lin<sup>1</sup>, Huazhu Fu<sup>2</sup>, Lei Zhu<sup>3,1</sup>, Xiaomeng Li<sup>1‡</sup>

<sup>1</sup> The Hong Kong University of Science and Technology, <sup>2</sup> IHPC, A\*STAR

<sup>3</sup> The Hong Kong University of Science and Technology (Guangzhou)

{xliangak, ylindw}@connect.ust.hk, hzfu@ieee.org, {leizhu, eexmli}@ust.hk

## A. Ablation Study for Various Unlabeled Client Ratios when Partitioning Fixed

We demonstrate that the effectiveness of our RSCFed is *due to uneven model reliability caused by the involved unlabeled clients*. When each client is either fully labeled or fully unlabeled, with a fixed number of clients, the more unlabeled clients, the better our RSCFed is.

Fig. 1 shows the performance of our method and the baseline method Fed-Consist [1] under different labeled and unlabeled client ratios. We empirically set the number of clients to 10 and consider the ratio of unlabeled/total clients as 0, 0.4, 0.6, 0.7, 0.8, 0.9.

We can observe that as the ratio of unlabeled clients increases, the improvements of our RSCFed over Fed-Consist in Accuracy and AUC scores consistently grow. It is worth mentioning that when the unlabeled ratio is small, a slight performance drop can be observed from our RSCFed against Fed-Consist. This is because the increased number of labeled clients reduce the *uneven model reliability*, limiting the performance of our RSCFed. Notably, RSCFed exceeds Fed-Consist when the ratio of unlabeled clients comes to 0.7. When the unlabeled ratio is 0.9, our RSCFed can reach 3.32% and 1.31% improvements in Accuracy, and AUC scores, respectively. Therefore, we demonstrate that with a fixed number of clients, the more unlabeled clients involved, the better our RSCFed is.

## B. Implementation Details

All local training in RSCFed is implemented with an SGD optimizer. The local learning rate is set according to the dataset. Specifically, for the SVHN dataset and CIFAR-100 dataset, we set the learning rate to 0.03 and 0.021 for labeled and unlabeled clients, respectively; For ISIC 2018 dataset, we set the learning rate to 2e-3 and 1e-3 for labeled and unlabeled clients, respectively. In each synchronization round, after the first global model is randomly ini-

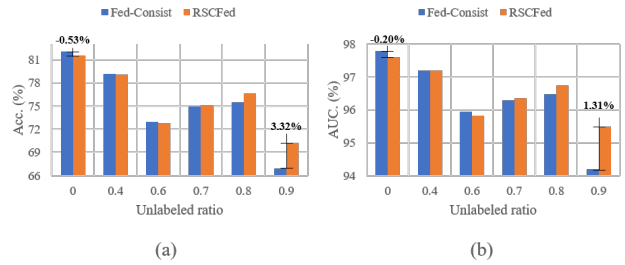

Figure 1. Performance curve of Fed-Consist [1] and our RSCFed under various unlabeled client ratios. The total number of clients is fixed to 10, and the  $x$ -axis refers to ratio of unlabeled clients among all clients.

tialized and assigned to the client-side, we firstly conduct supervised local training on the labeled client for 6 local epochs for SVHN and CIFAR-100 dataset, and 240 epochs for ISIC-2018 dataset, as a warming-up. The supervised pre-heated model then serves as the global model for training on labeled and unlabeled clients. In total, we train the model for 1,000 synchronization rounds<sup>1</sup>.

## References

- [1] Dong Yang, Ziyue Xu, Wenqi Li, Andriy Myronenko, Holger R Roth, Stephanie Harmon, Sheng Xu, Baris Turkbey, Evrim Turkbey, Xiaosong Wang, et al. Federated semi-supervised learning for covid region segmentation in chest ct using multi-national data from china, italy, japan. *Medical image analysis*, 70:101992, 2021.

<sup>1</sup>

<sup>‡</sup>Project lead and corresponding author.

<sup>1</sup>The code is available at <https://github.com/XMed-Lab/RSCFed>.
